# Supplementary material for: Skin breathable and stretchable electrode based on square-shaped AgNW bundle mesh with wavy bridges
Source: Royal Society of Chemistry journal article supplement (doi:10.1039/d3tc01229h), 2023-01-01
Supplement: d3tc01229h1.pdf [file d3tc01229h1.pdf]

## Electronic Supplementary Information (ESI)

# **Skin-Breathable and Stretchable Electrode Based on Square-Shaped AgNW Bundle Mesh with Wavy Bridges**

Eun Young An<sup>1,2,†</sup>, Siyoung Lee<sup>3,†</sup>, Jeong Ho Cho<sup>2</sup>, Geun Yeol Bae<sup>4,\*</sup>, and Gyojic Shin<sup>1,\*</sup>

E. Y. An and Dr. G. Shin

<sup>1</sup> Green and Sustainable Materials R&D Department, Korea Institute of Industrial Technology, Cheonan 31056, Korea

E. Y. An and Prof. J. H. Cho

<sup>2</sup> Department of Chemical and Biomolecular Engineering, Yonsei University, Seoul 03722, Korea

Dr. S. Lee

<sup>3</sup> Department of Mechanical and Industrial Engineering, University of Toronto, Toronto M5S 3G8, Canada

Prof. G. Y. Bae

<sup>4</sup> Department of Material Design Engineering, Kumoh National Institute of Technology, Gumi 39177, Korea

\* Correspondence: gyshin@kitech.re.kr (G.S.), gybae@kumoh.ac.kr (G.Y.B.)

† These authors contributed equally to this work.

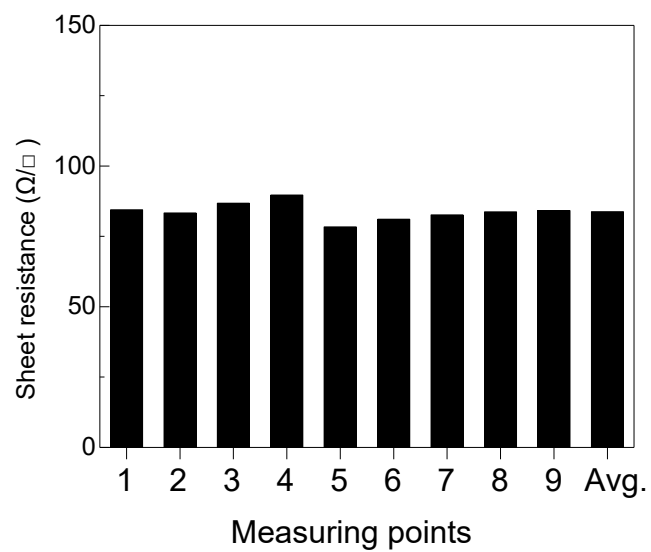

**Figure S1.** Sheet resistance values of the developed electrode (The size: 2.5 cm × 2.5 cm) depending on various measuring points. The standard deviation for all points is  $3.02 \Omega \square^{-1}$ .

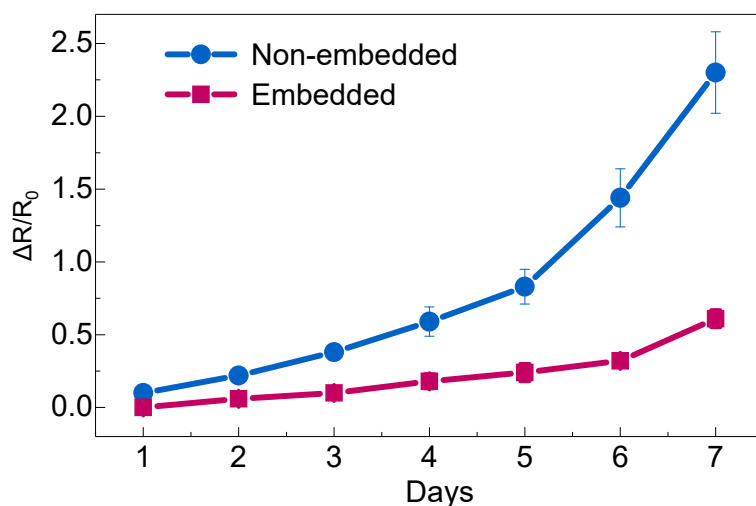

**Figure S2.** The relative resistance change ( $\Delta R/R_0$ ) in the stretchable electrode (Embedded) and bare silver nanowires (AgNWs) (Non-embedded) during 7 days at a constant temperature (23 °C) and humidity (30 %). The bare AgNWs were obtained by spray-coating AgNWs dispersion on microstructured PDMS substrate. The reference point (i.e., 0.0) of  $\Delta R/R_0$  corresponds to initial resistance just after the fabrication.

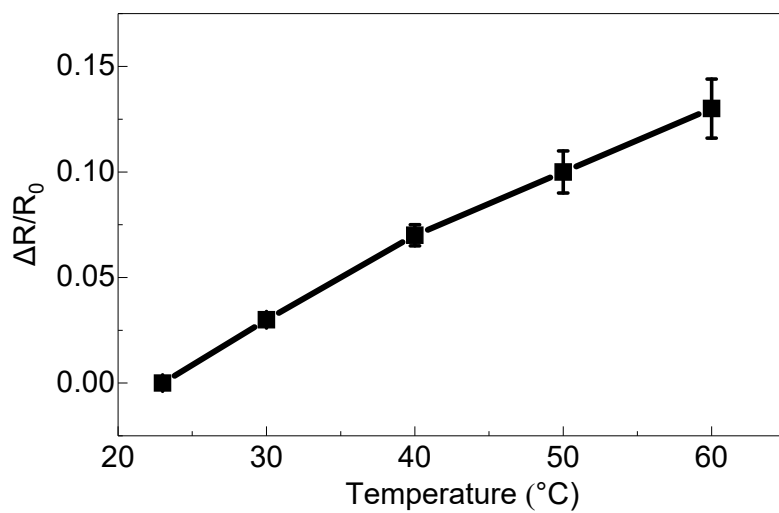

**Figure S3.** The relative resistance change ( $\Delta R/R_0$ ) in the stretchable electrodes at temperatures from room temperature (23 °C) to 60 °C. The reference point (i.e., 0) of  $\Delta R/R_0$  corresponds to the resistance at the room temperature.

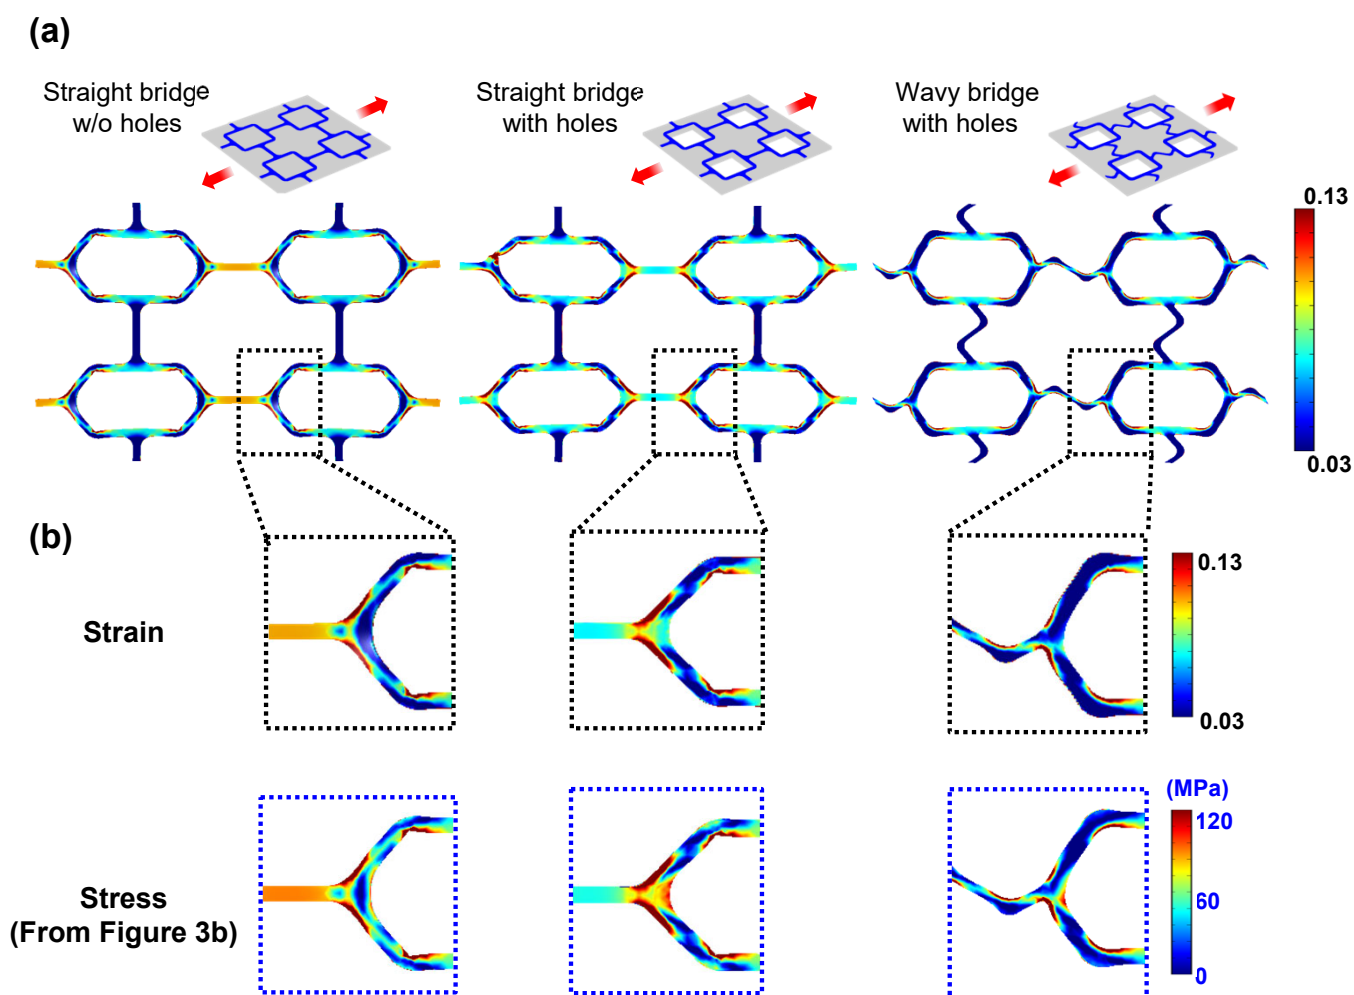

**Figure S4.** (a) Simulation data of the strain and deformation of stretchable electrodes depending on the hole array and the structure of bridges under 30 % stretching. (b) The comparison of the strain and stress (Figure 3b) results. The distributions of magnitudes for the strain and the stress are identical at bridges and square mesh structures but have a slight difference at the connection points between the bridges and the square meshes. Additional stress is applied to the connection points due to the compressive deformation of AgNW bundles.

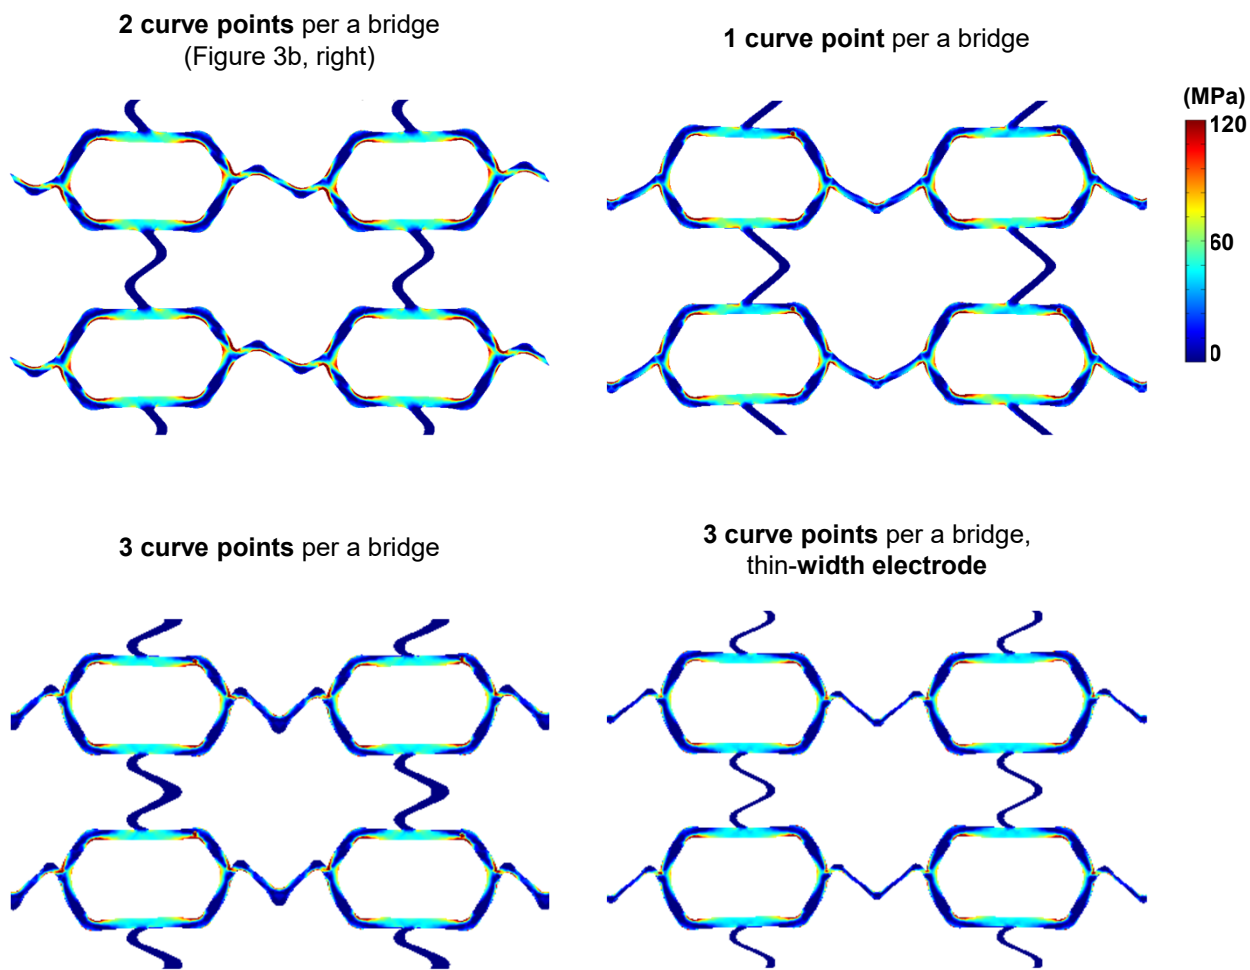

**Figure S5.** Simulation data of the stress distribution and deformation of stretchable electrodes under 30 % stretching, depending on the curve points and width of wavy bridges.

## Strain

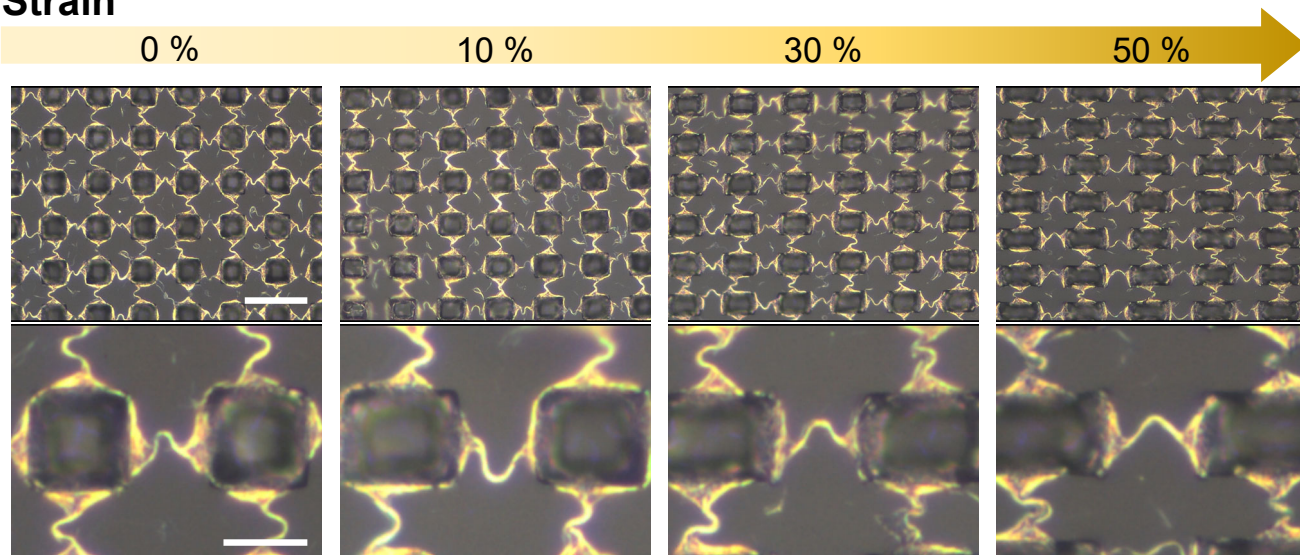

**Figure S6.** Optical images of the stretchable electrode depend on 10, 30, and 50 % strain. Top (Scale bar: 30  $\mu\text{m}$ ) and bottom (Scale bar: 10  $\mu\text{m}$ ) images show a wavy bridged silver nanowire micromesh array and a wavy silver nanowire bridge, respectively.

## Y-axis Strain

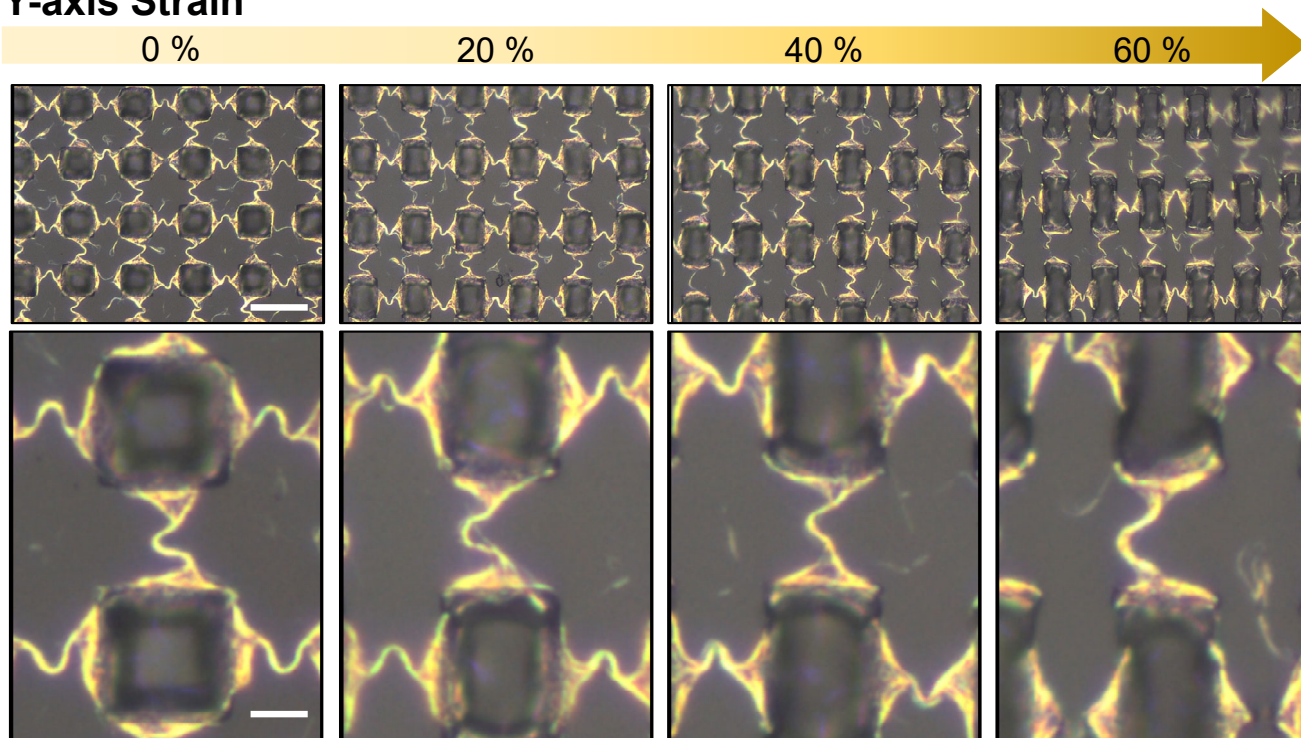

**Figure S7.** Optical images of the stretchable electrode depending on the Y-axis strain of 20, 40, and 60 %. Top (Scale bar: 20  $\mu\text{m}$ ) and bottom (Scale bar: 5  $\mu\text{m}$ ) images show a wavy bridged silver nanowire micromesh array and a wavy silver nanowire bridge, respectively.



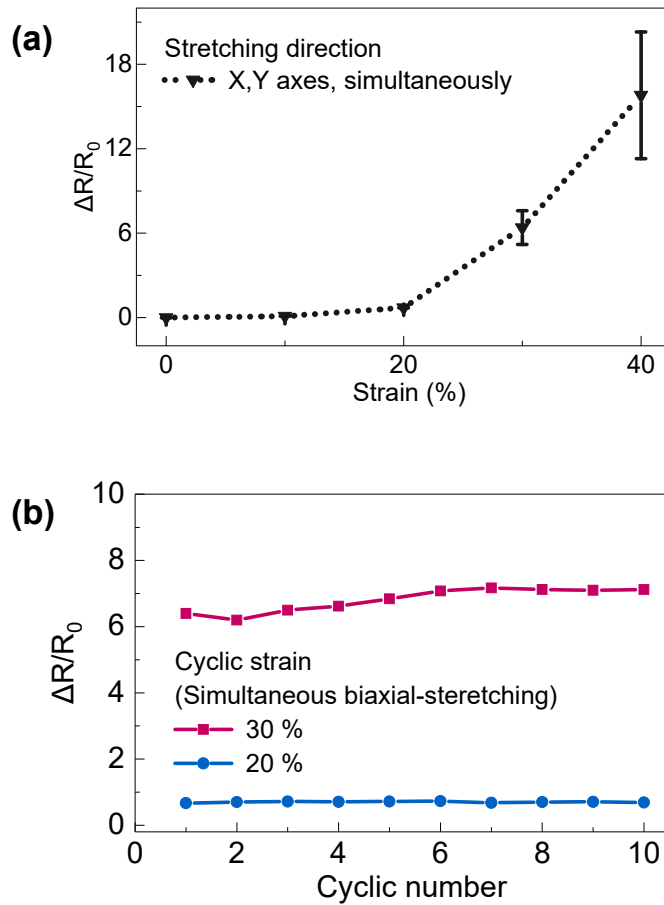

**Figure S8.** The biaxial stretchability and durability of the electrode. The relative resistance change ( $\Delta R/R_0$ ) in the stretchable electrodes under (a) simultaneous biaxial stretching test and (b) the cyclic strain (20 and 30 %) test.

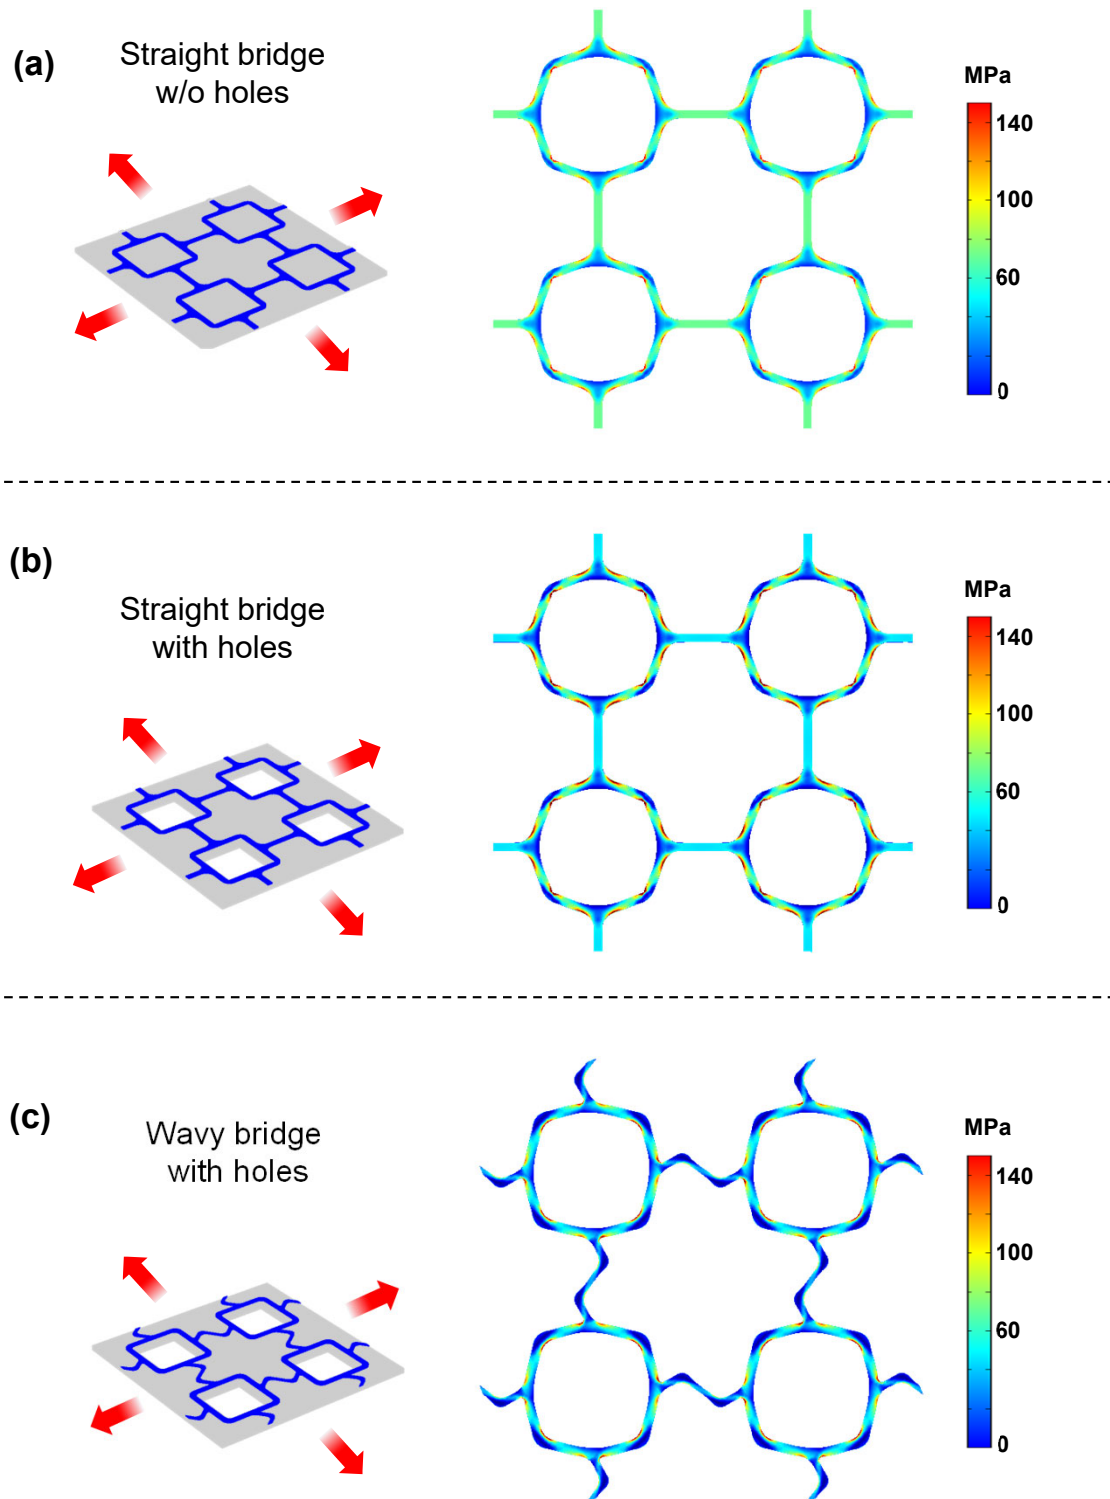

**Figure S9.** Simulation data of stress on and structure deformation of stretchable electrodes depending on the hole array and the structure of bridges under 20 % stretching per each X and Y axis simultaneously.

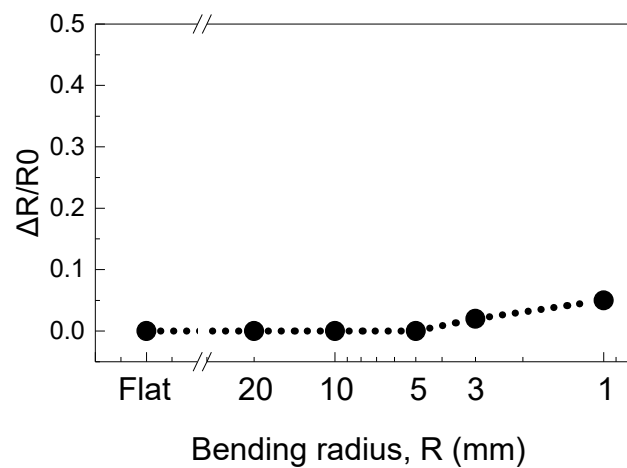

**Figure S10.** The relative resistance change ( $\Delta R/R_0$ ) in the stretchable electrodes depending on the curvature radii of attachment surfaces. The curved surfaces were prepared by utilizing the outer surface of various syringes and cotton swap rods.

| Ref. in the main text                                             | Fabricating process          | Electrode patterns           | Relative resistance change at stretching |                     | Vapor permeability |
|-------------------------------------------------------------------|------------------------------|------------------------------|------------------------------------------|---------------------|--------------------|
|                                                                   |                              |                              | Uniaxial (60%)                           | Biaxial (40%)       |                    |
| Our work                                                          | Spraying on a patterned mold | Micromesh with wavy bridges  | 13.2                                     | O / 15.8            | O                  |
| <i>Nano Lett.</i> , 2019, <b>19</b> , 6087 [16]                   | Laser ablation               | Kirigami                     | < 0.03                                   | X                   | -                  |
| <i>ACS Nano</i> , 2020, <b>14</b> , 5798 [31]                     | Dipcoating                   | Porous film                  | > 1000                                   | O / -               | O                  |
| <i>J. Mater. Chem. C</i> , 2019, <b>7</b> , 9748 [38]             | Electrospinning              | Nanofiber textiles           | 17.7                                     | O / -               | O                  |
| <i>Adv. Electron. Mater.</i> , 2020, <b>6</b> , 2000306 [24]      | Spraying with a shadow mask  | Nanomembrane                 | > 1000                                   | O / -               | O                  |
| <i>ACS Appl. Mater. Interfaces</i> , 2022, <b>14</b> , 57290 [44] | Spraying with a shadow mask  | Nanocomposite with elastomer | ~ 15                                     | O / -               | -                  |
| <i>ACS Appl. Mater. Interfaces</i> , 2019, <b>11</b> , 31210 [42] | Dropcasting, stencil mask    | Micropattern                 | > 50                                     | O / -               | -                  |
| <i>Nanotechnology</i> , 2016, <b>28</b> , 01LT0 [40]              | Spraying, leaf-templates     | Film                         | ~ 15 (at 50 %)                           | O / -               | -                  |
| <i>ACS Appl. Mater. Interfaces</i> , 2021, <b>13</b> , 59085 [41] | Spraying, laser cutting      | Kirigami                     | < 0.1 (at 50 %)                          | O / < 0.1 (at 50 %) | -                  |
| <i>ACS Mater. Lett.</i> , 2021, <b>3</b> , 912 [39]               | Electrospinning, spraying    | Microfiber textiles          | ~ 2                                      | O / -               | O                  |
| <i>Adv. Funct. Mater.</i> , 2019, <b>29</b> , 1902922 [43]        | Agitation                    | Layer by layer alignment     | -4.5 (at 40 %)                           | O / -               | -                  |

**Table S1.** Comparison of the fabrication process, electrode patterns, relative resistance change at 60 % stretching (uniaxial and biaxial directions), and vapor permeability between our work and previous works for a biaxially stretchable electrode made of silver nanowires. ‘O / -’ in the ‘biaxial’ section means that the corresponding work had the possibility of biaxial stretchability but did not test the relative resistance change at simultaneous biaxial stretching. ‘-’ in the ‘Vapor permeability’ section means that the work did not discuss vapor permeability or that their electrode may not have the permeability.

| Ref. [No. In the main text]                               | Materials               | Structures          | Electrical stretchability | Vapor permeability ( $\text{g}\cdot\text{m}^{-2}\cdot\text{h}^{-1}$ ) |
|-----------------------------------------------------------|-------------------------|---------------------|---------------------------|-----------------------------------------------------------------------|
| Our work                                                  | Ag NWs /WPU             | Hole pattern        | > 60 %                    | <b>~ 165</b> * <sup>1</sup><br>(T: 31 °C, H: 30%)                     |
| ACS Nano, 2021, <b>15</b> , 9955-9966 [28]                | Silk PEDOT:PSS Glycerol | Fiber mat           | ~ 200 %                   | <b>117</b><br>(T: 37 °C)                                              |
|                                                           |                         |                     |                           | <b>53</b><br>(T: 20 °C)                                               |
| Adv. Fiber Mater., 2021, <b>3</b> , 302 [30]              | Au sputtered fiber mat  | Fiber mat           | ~ 170 %                   | <b>35.42</b> * <sup>2</sup>                                           |
| ACS Nano, 2020, <b>14</b> , 5798 [31]                     | PU Ag NWs               | Porous film         | ~ 45 %                    | <b>~ 230</b> * <sup>3</sup><br>(T: 35 °C, H: 40%)                     |
| Adv. Mater., 2018, <b>30</b> , 1804327 [32]               | Graphene silicon film   | Porous Kirigami     | ~ 1000 %                  | <b>180</b> * <sup>4</sup><br>(T: 20 °C)                               |
| Nat. Commun., 2014, <b>5</b> , 4779 [45]                  | Au fabric silicone film | Permeable film      | ~ 220 %                   | <b>7 ~ 9</b>                                                          |
| Adv. Electron. Mater., 2020, <b>6</b> , 2000306 [24]      | AgNWs + TPE             | Nanomembrane        | 62 %                      | <b>24.17</b> * <sup>5</sup><br>(T: 20 °C)                             |
| ACS Appl. Mater. Interfaces, 2019, <b>11</b> , 28387 [46] | PI/Au/Ti/PI             | Kirigami-serpentine | ~ 80 %                    | <b>20</b>                                                             |
| J. Mater. Chem. C, 2019, <b>7</b> , 9748 [38]             | AgNW/TPU                | Nanofiber textiles  | 50 %                      | <b>9.5</b>                                                            |
| ACS Mater. Lett., 2021, <b>3</b> , 912 [39]               | AgMW/TPU                | Nanofiber textiles  | > 600 %                   | <b>13.9</b>                                                           |

**Table S2.** Comparison of materials, structures, electrical stretchability, conformity, and vapor permeability among our work and previous works. ‘T’ and ‘H’ represent temperature and humidity, respectively. The reference information corresponding to the earlier works is listed below.

\*<sup>1</sup> 0.78 g per 7 days, the diameter of circular permeability area: 6 mm, \*<sup>2</sup> ~850  $\text{g}\cdot\text{m}^{-2}$  per a day,

\*<sup>3</sup> ~ 23  $\text{mg}\cdot\text{cm}^{-2}$  per an hour, \*<sup>4</sup> ~ 1.8  $\text{g}\cdot\text{cm}^{-2}$  per 100 hours, \*<sup>5</sup> ~ 580.18  $\text{g}\cdot\text{m}^{-2}$  per a day.
